# Supplementary material for: Topological stress is responsible for the detrimental outcomes of head-on replication-transcription conflicts
Source: PubMed Central journal article supplement (PMC7986047; doi:10.1016/j.celrep.2021.108797), 2021-03-02
Supplement: NIHMS1679665-supplement-1.pdf [file NIHMS1679665-supplement-1.pdf]

**Cell Reports, Volume 34**

**Supplemental information**

**Topological stress is responsible  
for the detrimental outcomes of  
head-on replication-transcription conflicts**

**Kevin S. Lang and Houra Merrikh**

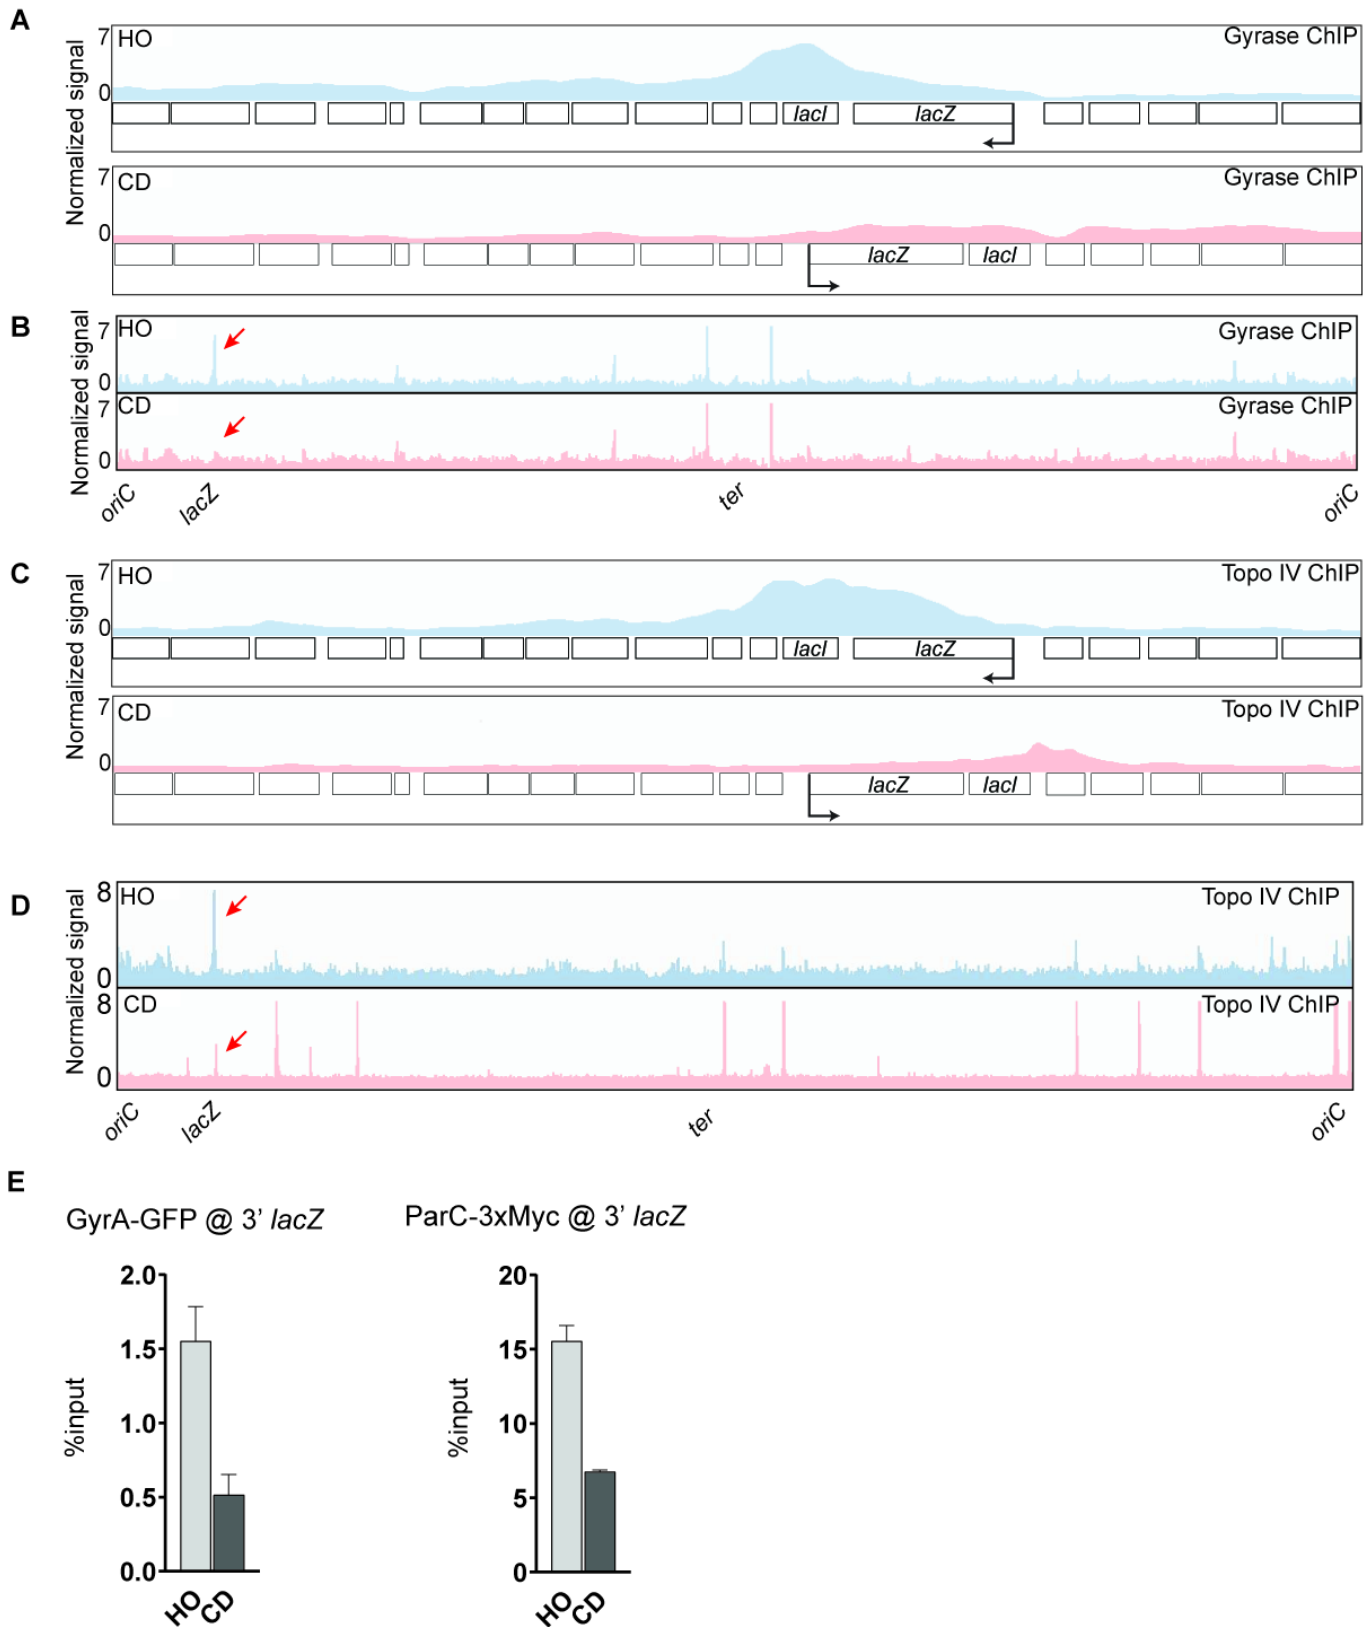

**Supplementary Figure 1. Association of type II topoisomerases with head-on genes is dependent on transcription. Related to Figure 1.** Replicate ChIP-Seq profiles of **(A)** gyrase and **(C)** Topo IV at the engineered conflict locus and **(B)** and **(D)** genome-wide in cells carrying either a head-on (HO, blue, strain HM3863 (gyrase), HM4074 (ParC)) or co-directional (CD, red, strain HM3864 (gyrase), HM4075 (ParC)) *lacZ* engineered conflict. The direction of DNA replication is left to right. Direction of transcription is indicated by the promoter arrow on *lacZ*. **(E)** ChIP-qPCR data from **Fig. 1C-D** presented as percent input. Bars represent the mean and standard error.

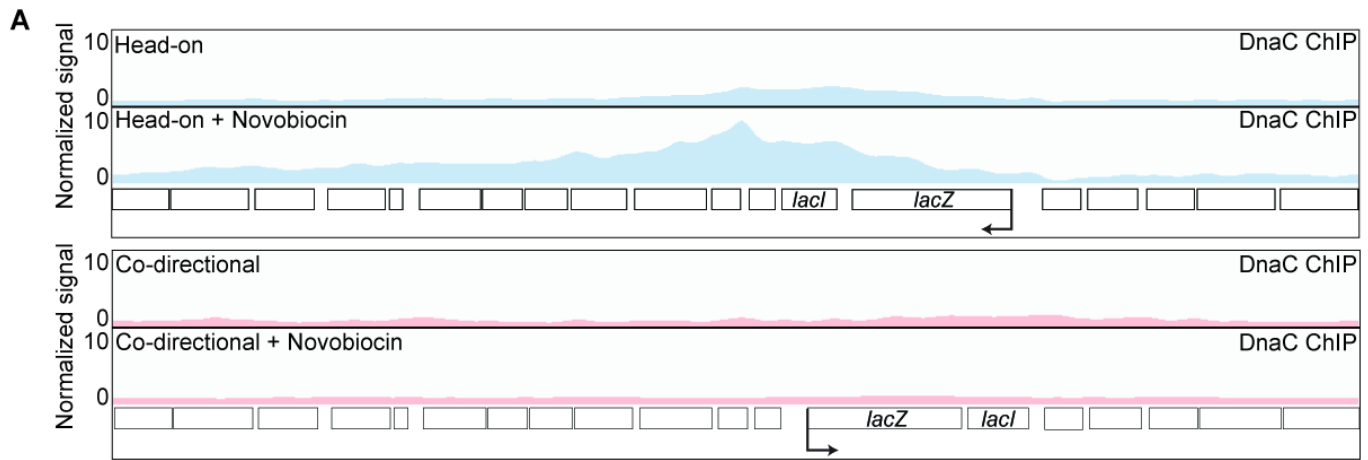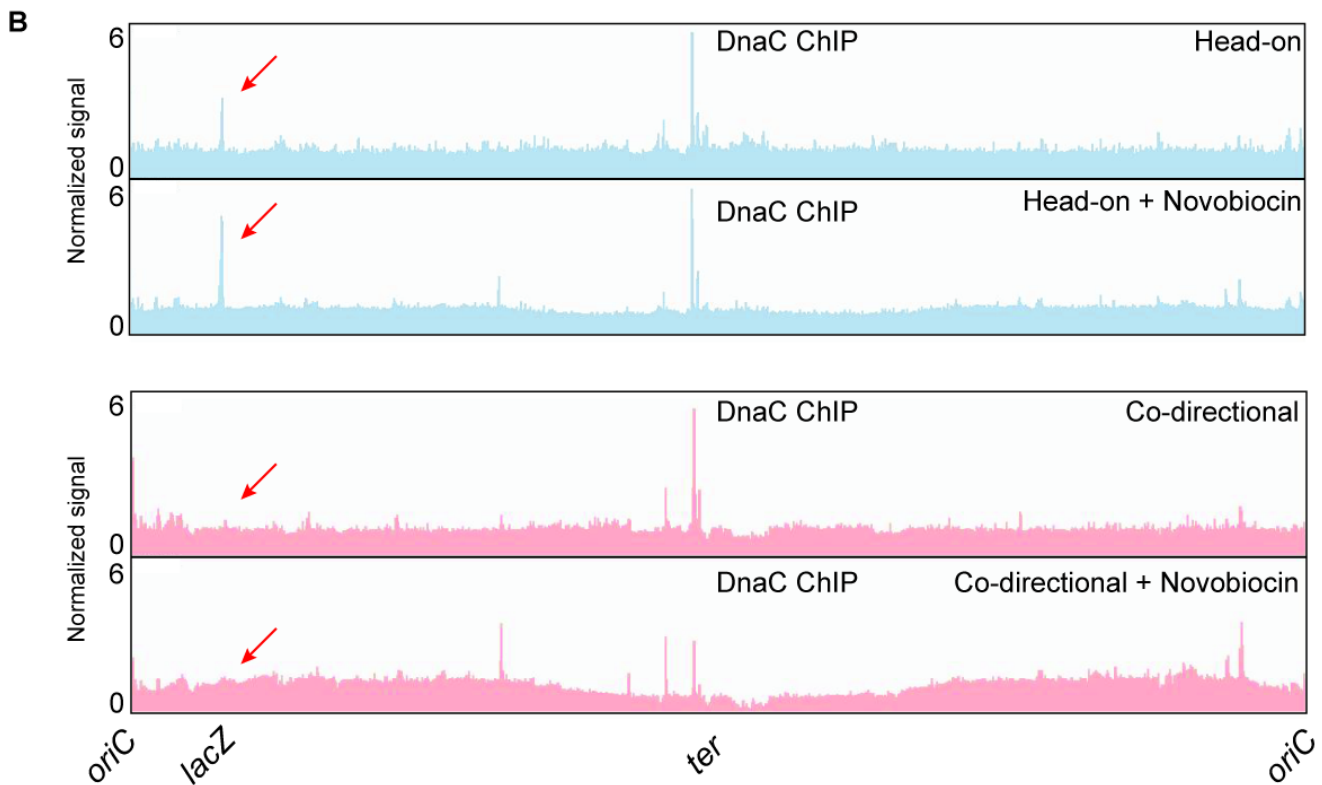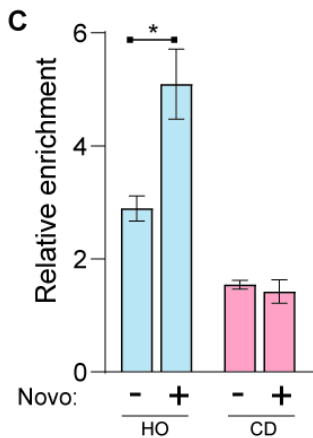

**Supplementary Figure 2. Association of the replicative helicase at engineered conflict regions. Related to Figure 2.** Replicate ChIP-Seq profiles at the engineered conflict locus (**A**) and genome-wide **b**, of DnaC in cells carrying either a head-on (HO, blue, strain HM1300) or co-directional (CD, red, strain HM1416) *lacZ*

engineered conflict, with and without novobiocin treatment (375 ng/mL). The direction of DNA replication is left to right. Direction of transcription is indicated by the promoter arrow on *lacZ*. Red arrow shows the location of the engineered conflict locus in the genome-wide plot. **c**, ChIP-qPCR analysis of the 3' region of *lacZ* with and without novobiocin treatment. The bars represent the mean and standard error of 4 biological replicates. (\*) represents  $p < 0.05$ .

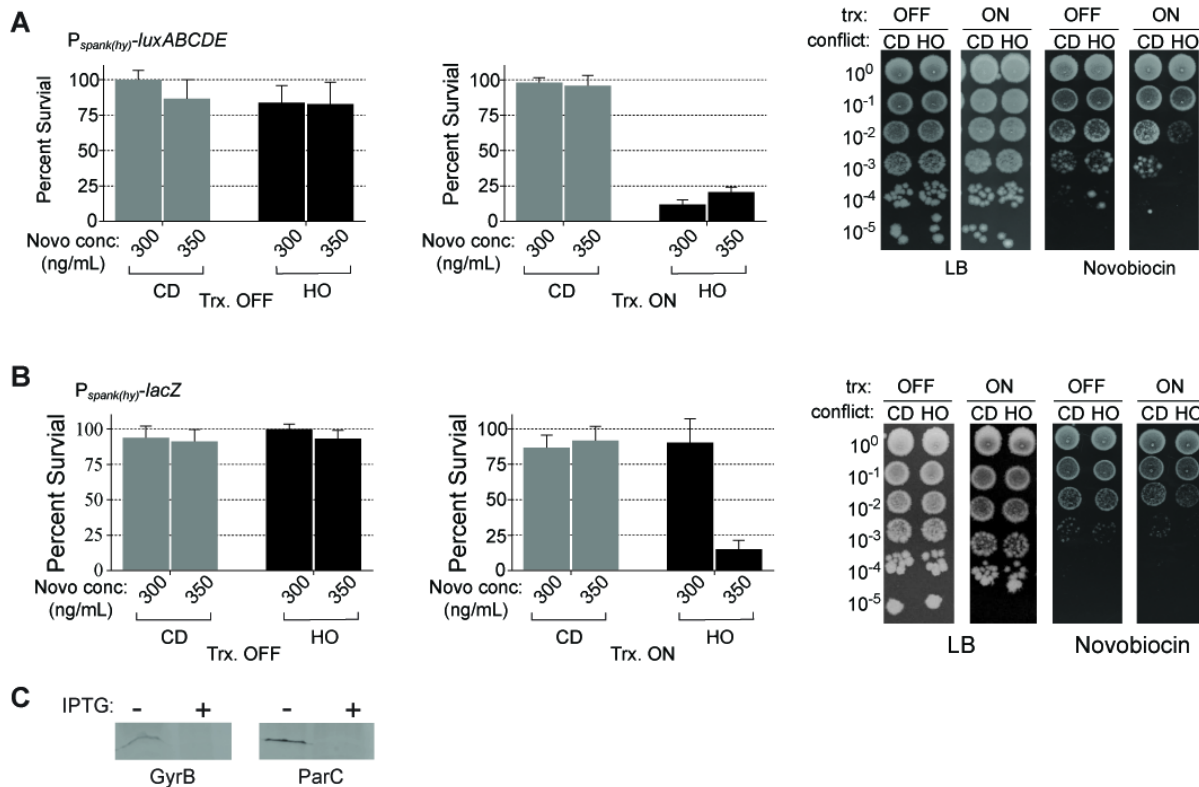

**Supplementary Figure 3. Sensitivity of cells expressing a highly transcribed gene is independent of gene sequence and genomic location. Related to Figure 3.** Novobiocin survival assays of cells expressing  $P_{spank(hy)}-luxABCDE$  (A) and  $P_{spank(hy)}-lacZ$  (B) at the *amyE* locus. Quantification is shown as percent survival (average, +/- standard deviation). Representative plates of the highest novobiocin concentration (350 ng/mL) are shown. (C) Slot blot analysis of depletions of GyrB and ParC using the degron systems.

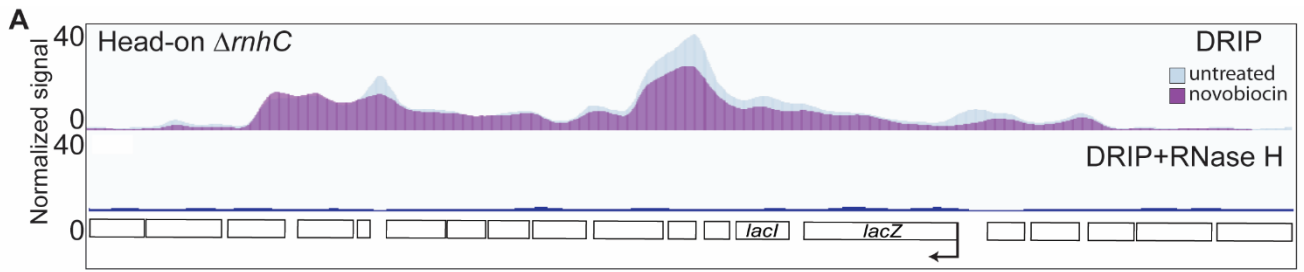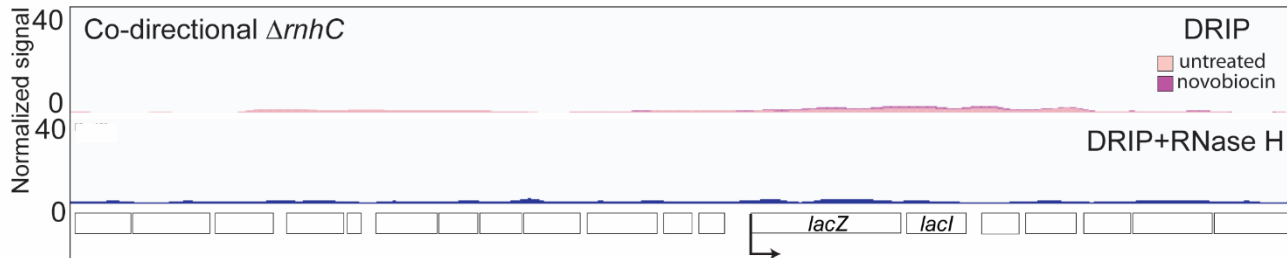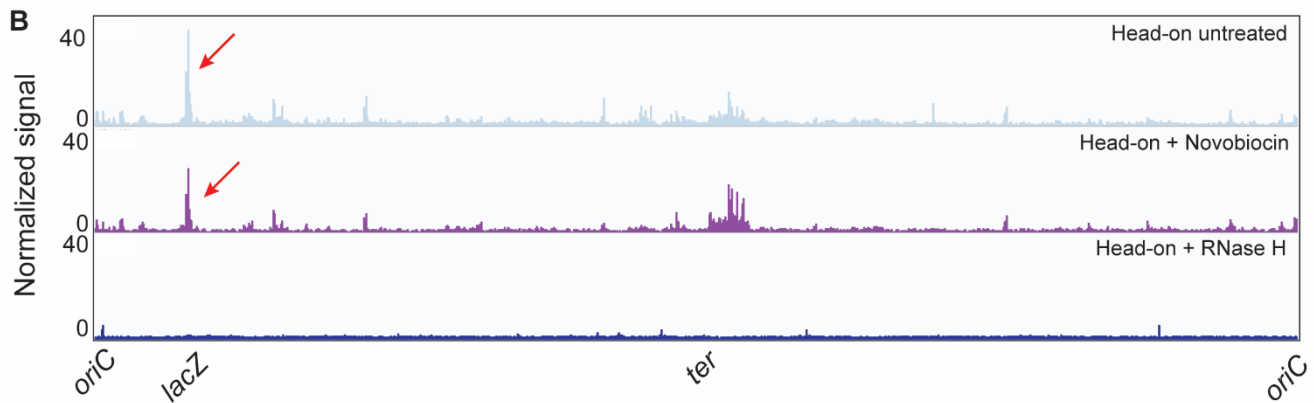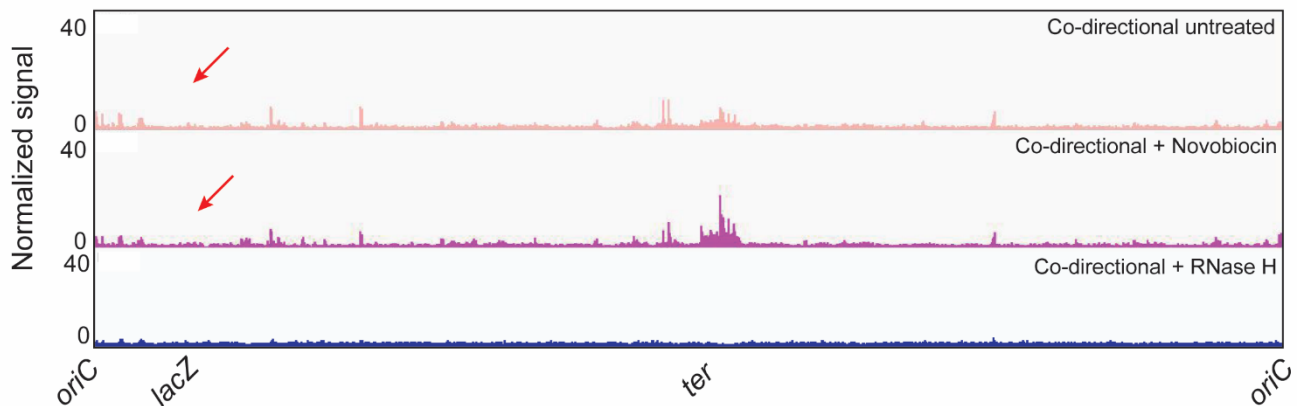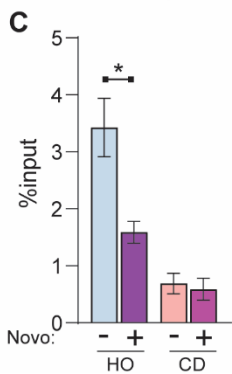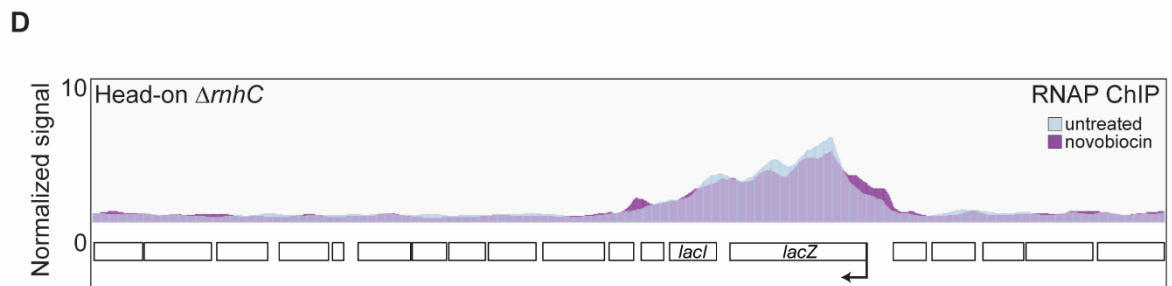

**Supplementary Figure 4. R-loop levels at the engineered head-on conflict region are reduced in novobiocin treated cells. Related to Figure 4 (A)** Replicate DRIP-Seq profiles of cells lacking RNase HIII harboring either a head-on (HO, blue, strain HM2043) or co-directional (CD, red, strain HM2044) *lacZ* engineered

conflict treated or untreated with novobiocin. Genome-wide maps are shown in **(B)**. The bottom panel of all DRIP-Seq plots are the RNase H treated controls. **(C)** DRIP-qPCR analysis of the 3' region of *lacZ* with and without novobiocin treatment represented as percent input. The bars represent the mean and standard error of 4 biological replicates. (\*) represents  $p < 0.05$ . **(D)** Representative RNAP ChIP-seq plot of  $\Delta rnhC$  cells expressing the head-on engineered conflict untreated (blue) and treated with novobiocin (magenta). The conditions are shown as an overlay.

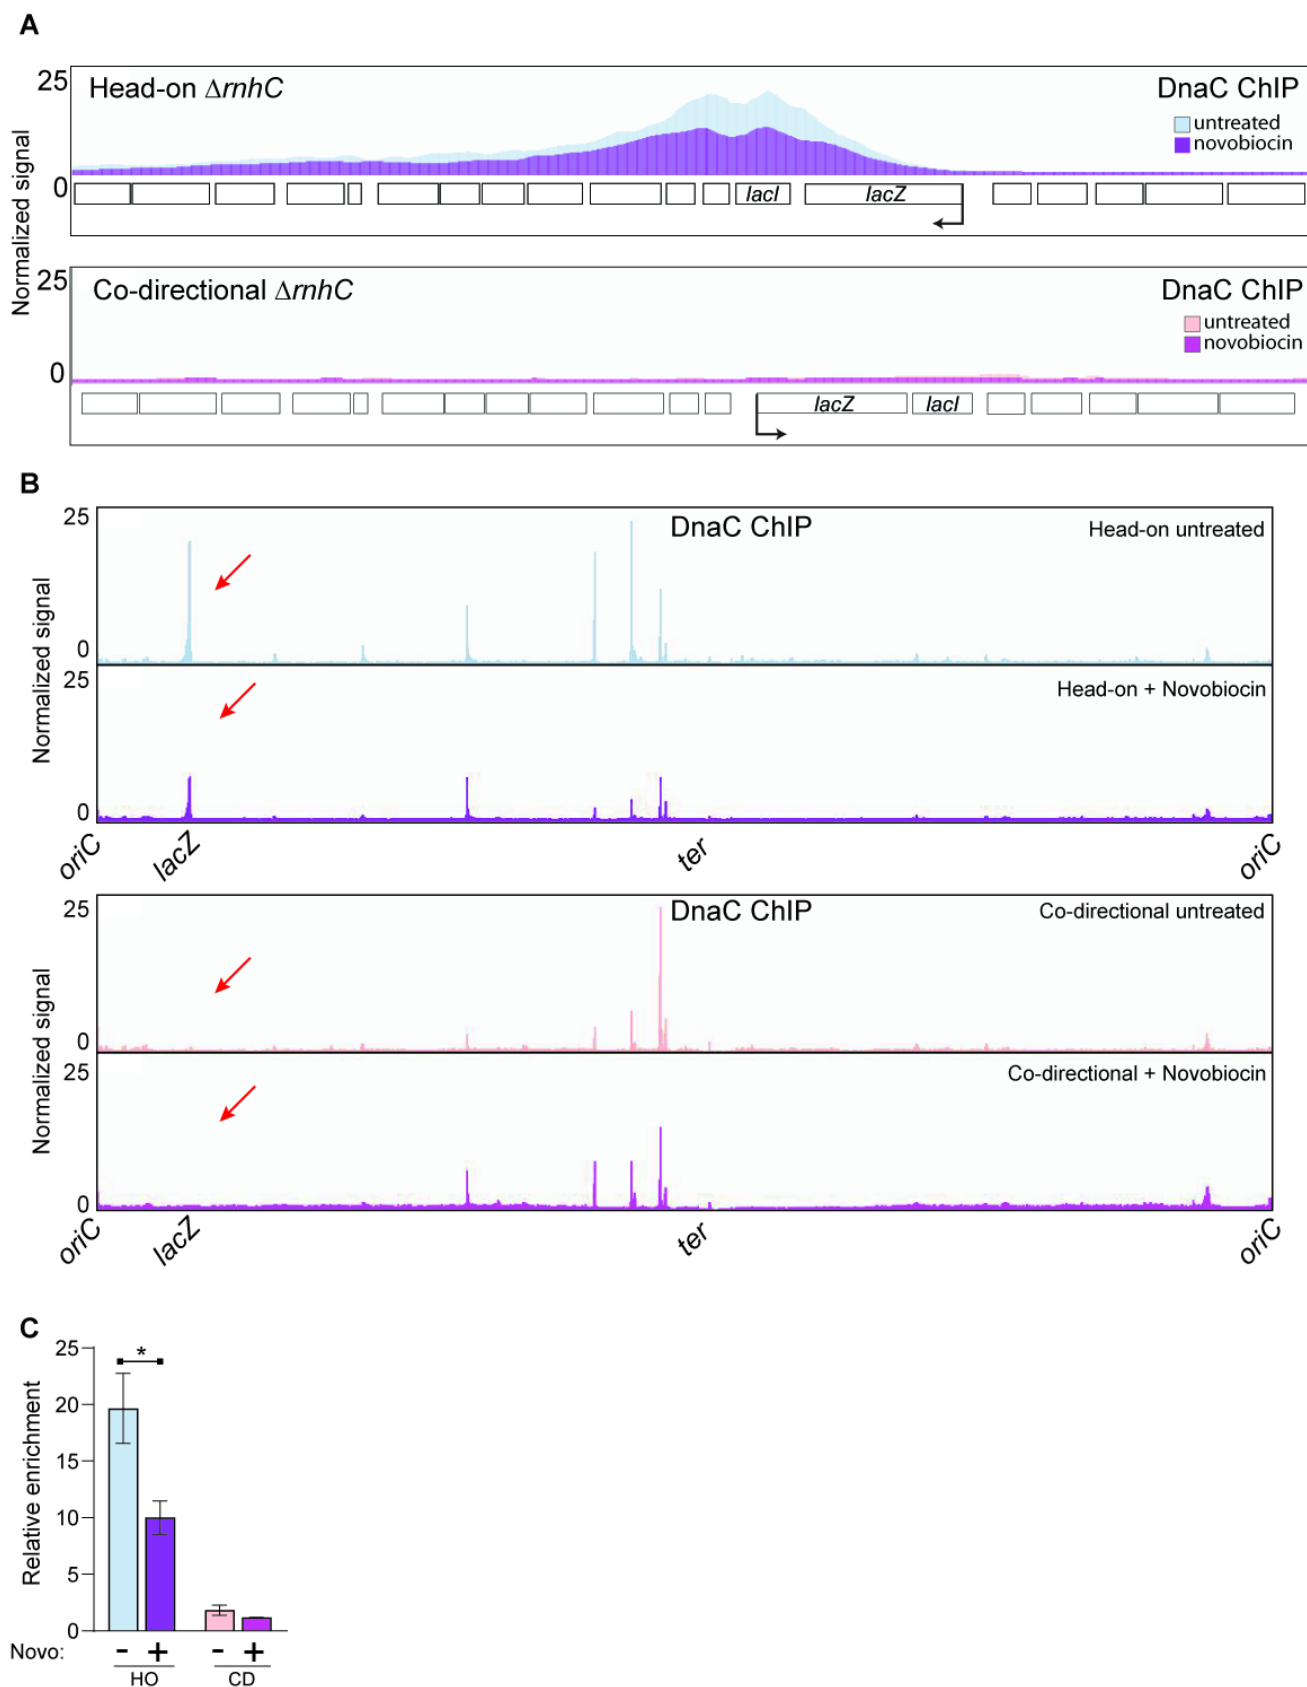

**Supplementary Figure 5. Replication fork stalling due to R-loops at the engineered head-on conflict region is reduced with type II topoisomerase inhibition. Related to Figure 4. (A)** Replicate DnaC ChIP-Seq profiles of cells lacking RNase HIII harboring either a head-on (HO, blue, strain HM2043) or co-directional (CD, red, strain HM2044) *lacZ* engineered conflict treated or untreated with novobiocin. Genome-wide maps are shown in **(B)**. **(C)** ChIP-qPCR analysis of the 3' region of *lacZ* with and without novobiocin treatment in cells lacking *rmhC*. The bars represent the mean and standard error of 4 biological replicates. (\*) represents  $p < 0.05$ .



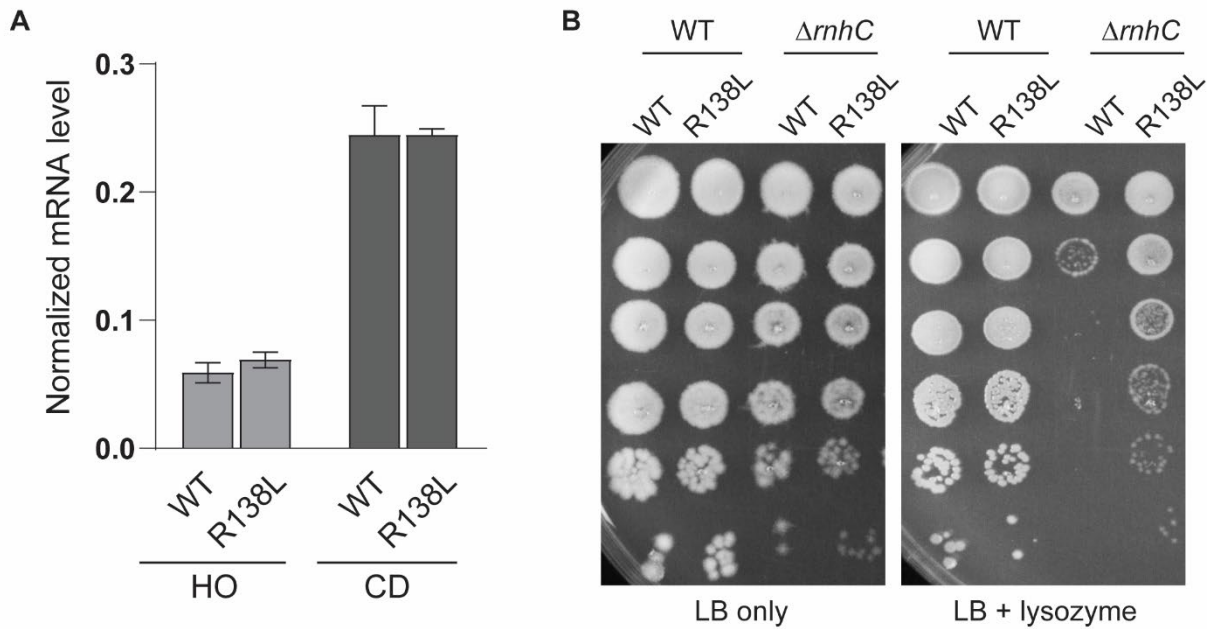

**Supplementary Figure 6. Transcript levels of *lacZ* do not change in the R138L gyrase mutant, but stress response defects are rescued. Related to Figure 5. (A)** qRT-PCR analysis measuring mRNA levels of *lacZ* relative to a housekeeping gene *rrs* in cells lacking RNase HIII with either the WT or R138L *gyrB* allele harboring either a head-on (HO, HM2043/HM4065) or co-directional (CD, HM2044/HM4066) *lacZ* engineered conflict. **(B)** Representative survival assays of WT cells or cells lacking RNase HIII with either the WT or R138L *gyrB* allele plated on either LB or LB containing 50  $\mu$ g/ml of lysozyme.

**Supplementary Table 1. Gyrase ChIP-Seq peaks identified genome-wide. Related to Figure 1.**

| start <sup>a</sup> | end <sup>a</sup> | peak score <sup>b</sup> | nearest gene |
|--------------------|------------------|-------------------------|--------------|
| 2197501            | 2199971          | 55457.4                 | yonT         |
| 1981403            | 1984331          | 42368.6                 | yoeD         |
| 327538             | 329328           | 33419.7                 | lacZ-lacI    |
| 3755421            | 3755631          | 3346.4                  | ywmC         |
| 1671341            | 1671441          | 720.7                   | sucD         |

- a. Start and end genomic coordinates of peaks
- b. Peak score calculated by Homer (IP compared to input)

**Supplementary Table 2. ParC ChIP-Seq peaks identified genome-wide. Related to Figure 1.**

| start <sup>a</sup> | end <sup>a</sup> | peak score <sup>b</sup> | nearest gene     |
|--------------------|------------------|-------------------------|------------------|
| 326665             | 331715           | 110502                  | <i>lacZ-lacI</i> |
| 4189638            | 4190485          | 18922.1                 | <i>trmF</i>      |
| 5273               | 6189             | 17170.5                 | <i>gyrB</i>      |
| 4190470            | 4191199          | 15568.1                 | <i>trmE</i>      |
| 4187156            | 4187531          | 4796                    | <i>noc</i>       |
| 138158             | 138458           | 4278.9                  | <i>rpsS</i>      |
| 3935623            | 3936099          | 3978.1                  | <i>ilvK</i>      |
| 326461             | 326761           | 3445.6                  | <i>ycgB</i>      |
| 3936882            | 3937182          | 2945.5                  | <i>ilvK</i>      |
| 4191433            | 4191847          | 2442.2                  | <i>trmE</i>      |
| 4152542            | 4152992          | 1863.4                  | <i>yybL</i>      |
| 325129             | 325429           | 1773.5                  | <i>ycgA</i>      |
| 4153041            | 4153501          | 1677                    | <i>yybL</i>      |
| 4110512            | 4110890          | 1352.8                  | <i>yydD</i>      |
| 4186262            | 4186562          | 1217.4                  | <i>yyaB</i>      |
| 3646262            | 3646562          | 1010.7                  | <i>ggaB</i>      |
| 4153729            | 4154029          | 911.9                   | <i>yybK</i>      |

a. Start and end genomic coordinates of peaks

b. Peak score calculated by Homer (IP compared to input)

**Supplementary Table 3. DnaC CHIP-Seq peaks identified genome-wide in wild-type cells. Related to Figure 2.**

| start <sup>a</sup> | end <sup>a</sup> | peak score <sup>b</sup> | nearest gene     | average signal intensity (+/- std dev) <sup>c</sup> |                  |
|--------------------|------------------|-------------------------|------------------|-----------------------------------------------------|------------------|
|                    |                  |                         |                  | untreated                                           | treated          |
| 323023             | 331140           | 174468                  | <i>lacZ-lacI</i> | 1.939(+/-0.073)                                     | 4.297(+/-1.11)   |
| 243                | 3049             | 41350.5                 | <i>dnaN</i>      | 3.3675(+/-0.415)                                    | 3.198(+/-1.075)  |
| 3936777            | 3937154          | 5900.9                  | <i>licH</i>      | 1.222(+/-0.094)                                     | 2.8335(+/-0.929) |
| 1997029            | 1997908          | 4823.2                  | <i>yoxB</i>      | 15.537(+/-0.357)                                    | 6.4325(+/-2.001) |
| 4193215            | 4193743          | 4189.2                  | <i>oxaAA</i>     | 2.387(+/-0.297)                                     | 2.518(+/-0.961)  |
| 3935747            | 3936047          | 2306.7                  | <i>ilvK</i>      | 1.394(+/-0.087)                                     | 2.495(+/-0.456)  |
| 1763564            | 1763864          | 1175.3                  | <i>cotE</i>      | 1.306(+/-0.058)                                     | 1.743(+/-0.673)  |

- a. Start and end genomic coordinates of peaks
- b. Peak score calculated by Homer (IP compared to input)
- c. Average read density (ip/input) across replicate experiments within the peak regions.

**Supplementary Table 4. Cut sites used for DRIP-Seq chromosome fragmentation at the engineered conflict locus. Related to Figure 4.**

| Fragment length | Enzyme sites                |
|-----------------|-----------------------------|
| 2076            | EcoRI-5997-Dral-8073        |
| 1963            | EcoRI-14898-EcoRV-16861     |
| 1481            | Dral-19469-Dral-20950       |
| 1219            | Dral-8753-EcoRV-9972        |
| 1178            | EcoRV-16861-HindIII-18039   |
| 1074            | HindIII-3686-Dral-4760      |
| 987             | EcoRV-13788-Dral-14775      |
| 831             | Dral-4760-Dral-5591         |
| 822             | HindIII-2534-HindIII-3356   |
| 797             | HindIII-353-HindIII-1150    |
| 779             | HindIII-24016-HindIII-24795 |
| 675             | Dral-18794-Dral-19469       |
| 663             | Dral-8073-HindIII-8736      |
| 663             | HindIII-11589-Dral-12252    |
| 657             | Dral-23340-EcoRV-23997      |
| 624             | Dral-22242-Dral-22866       |
| 599             | Dral-13189-EcoRV-13788      |
| 551             | EcoRV-21179-Dral-21730      |
| 512             | Dral-21730-Dral-22242       |
| 490             | Dral-12699-Dral-13189       |
| 474             | Dral-22866-Dral-23340       |
| 451             | Dral-2083-HindIII-2534      |
| 447             | Dral-12252-Dral-12699       |
| 424             | EcoRI-10979-HindIII-11403   |
| 395             | HindIII-18039-EcoRI-18434   |
| 381             | Dral-10598-EcoRI-10979      |
| 353             | start-HindIII-353           |
| 307             | EcoRV-9972-HindIII-10279    |
| 291             | EcoRV-1792-Dral-2083        |
| 273             | HindIII-3413-HindIII-3686   |
| 263             | Dral-18531-Dral-18794       |
| 237             | HindIII-1150-Dral-1387      |
| 229             | Dral-20950-EcoRV-21179      |
| 211             | HindIII-10387-Dral-10598    |
| 208             | EcoRV-25043-end             |
| 186             | HindIII-11403-HindIII-11589 |
| 177             | EcoRV-1615-EcoRV-1792       |
| 175             | HindIII-24868-EcoRV-25043   |
| 162             | Dral-1387-EcoRV-1549        |
| 155             | Dral-5591-Dral-5746         |
| 126             | Dral-5746-Dral-5872         |
| 125             | Dral-5872-EcoRI-5997        |
| 123             | Dral-14775-EcoRI-14898      |
| 108             | HindIII-10279-HindIII-10387 |
| 97              | EcoRI-18434-Dral-18531      |
| 73              | HindIII-24795-HindIII-24868 |

|    |                           |
|----|---------------------------|
| 66 | EcoRV-1549-EcoRV-1615     |
| 57 | HindIII-3356-HindIII-3413 |
| 19 | EcoRV-23997-HindIII-24016 |
| 17 | HindIII-8736-DraI-8753    |

**Supplementary Table 5. DRIP-Seq peaks identified genome-wide in  $\Delta$ rnhC cells. Related to Figure 4.**

| start <sup>a</sup> | end <sup>a</sup> | peak score <sup>b</sup> | nearest gene     | average signal intensity (+/- std dev) <sup>c</sup> |                    |
|--------------------|------------------|-------------------------|------------------|-----------------------------------------------------|--------------------|
|                    |                  |                         |                  | untreated                                           | treated            |
| 326514             | 328288           | 104923.5                | <i>lacZ-lacI</i> | 31.8915(+/-3.2885)                                  | 23.727(+/-2.849)   |
| 320595             | 321068           | 10352.6                 | <i>yceK</i>      | 21.464(+/-2.932)                                    | 11.642(+/-2.876)   |
| 2195721            | 2196840          | 9727.1                  | <i>yonX</i>      | 17.494(+/-5.43)                                     | 13.774(+/-3.09)    |
| 2205720            | 2206116          | 4312.5                  | <i>yonK</i>      | 6.863(+/-0.655)                                     | 12.199(+/-1.829)   |
| 2199715            | 2200167          | 3476                    | <i>yonR</i>      | 15.2025(+/-5.6295)                                  | 9.519(+/-2.333)    |
| 3156556            | 3156856          | 3125.6                  | <i>thiT</i>      | 4.044(+/-0.814)                                     | 4.1605(+/-1.4335)  |
| 2195342            | 2195728          | 2761.9                  | <i>yopA</i>      | 15.323(+/-5.207)                                    | 14.4445(+/-3.7375) |
| 2203688            | 2203988          | 2586.7                  | <i>yonN</i>      | 5.282(+/-0.317)                                     | 8.936(+/-0.976)    |
| 942449             | 942749           | 2149.6                  | <i>spo0M</i>     | 11.3975(+/-0.0865)                                  | 7.1765(+/-0.7225)  |
| 1894389            | 1894764          | 2115.7                  | <i>cotC</i>      | 8.957(+/-1.865)                                     | 3.2955(+/-0.4705)  |
| 2199497            | 2199797          | 1706.9                  | <i>yonS</i>      | 14.1335(+/-5.7965)                                  | 10.0885(+/-2.0395) |
| 2225847            | 2226332          | 1652.3                  | <i>youB</i>      | 8.043(+/-1.796)                                     | 8.5895(+/-2.7065)  |
| 2200908            | 2201208          | 1612.7                  | <i>yonO</i>      | 11.68(+/-3.27)                                      | 8.126(+/-1.701)    |
| 2165020            | 2165320          | 1053.2                  | <i>yorF</i>      | 4.725(+/-0.678)                                     | 3.674(+/-0.432)    |
| 2184825            | 2185125          | 1011.7                  | <i>yopQ</i>      | 6.2645(+/-1.7985)                                   | 4.491(+/-1.051)    |
| 100138             | 100438           | 906.2                   | <i>ctsR</i>      | 1.714(+/-0.265)                                     | 1.7595(+/-0.4875)  |

a. Start and end genomic coordinates of peaks

b. Peak score calculated by Homer (IP compared to input)

c. Average read density (ip/input) across replicate experiments within the peak regions.

**Supplementary Table 6. DnaC ChIP-Seq peaks identified genome-wide in  $\Delta$ rnhC cells. Related to Figure 4.**

| start <sup>a</sup> | end <sup>a</sup> | peak score <sup>b</sup> | nearest gene     | average signal intensity (+/- std dev) <sup>c</sup> |                   |
|--------------------|------------------|-------------------------|------------------|-----------------------------------------------------|-------------------|
|                    |                  |                         |                  | untreated                                           | treated           |
| 318699             | 331480           | 325183.6                | <i>lacZ-lacI</i> | 12.169(+/-2.378)                                    | 7.8815(+/-1.3485) |
| 1892711            | 1896089          | 50375                   | <i>cotC</i>      | 16.607(+/-4.462)                                    | 4.157(+/-0.433)   |
| 1995150            | 1998713          | 49744.2                 | <i>rtp</i>       | 11.6215(+/-1.5545)                                  | 6.8645(+/-0.5535) |
| 1762517            | 1765736          | 46372.4                 | <i>cotE</i>      | 12.973(+/-2.762)                                    | 3.7645(+/-1.4635) |
| 1311141            | 1312741          | 23008.7                 | <i>xkdC</i>      | 9.7685(+/-4.1445)                                   | 8.5015(+/-1.2095) |
| 317781             | 318312           | 10485.9                 | <i>niaP</i>      | 4.736(+/-1.022)                                     | 3.743(+/-0.756)   |
| 317248             | 317513           | 4803.1                  | <i>niaP</i>      | 4.5265(+/-1.3085)                                   | 3.2575(+/-0.5705) |
| 316756             | 316980           | 2770                    | <i>yceH</i>      | 4.2335(+/-1.4415)                                   | 2.786(+/-0.585)   |
| 2014811            | 2015077          | 1986.8                  | <i>yoaM</i>      | 4.3525(+/-0.6565)                                   | 3.5695(+/-0.5045) |
| 2015730            | 2016078          | 1863.4                  | <i>yozS</i>      | 5.3065(+/-0.4825)                                   | 3.3(+/-1.395)     |
| 942138             | 942288           | 983.8                   | <i>spo0M</i>     | 4.2355(+/-1.2235)                                   | 1.812(+/-0.072)   |
| 1892228            | 1892378          | 513.1                   | <i>thyA</i>      | 3.5535(+/-0.1195)                                   | 1.0505(+/-0.2205) |
| 941681             | 941831           | 499.6                   | <i>spo0M</i>     | 3.579(+/-0.523)                                     | 1.777(+/-0.256)   |
| 1896289            | 1896439          | 486.1                   | <i>ynzB</i>      | 3.802(+/-0.718)                                     | 1.5965(+/-0.1455) |

- a. Start and end genomic coordinates of peaks
- b. Peak score calculated by Homer (IP compared to input)
- c. Average read density (ip/input) across replicate experiments within the peak regions.
